# Supplementary material for: Virulence Potential of Biofilm-Producing Staphylococcus pseudintermedius, Staphylococcus aureus and Staphylococcus coagulans Causing Skin Infections in Companion Animals
Source: MDPI journal article supplement (doi:10.3390/antibiotics11101339), 2022-09-30
Supplement: s1 [file s1]

# Virulence Potential of Biofilm-Producing *Staphylococcus pseudintermedius*, *Staphylococcus aureus* and *Staphylococcus coagulans* Causing Skin Infections in Companion Animals

Mariana Andrade, Ketlyn Oliveira, Catarina Morais, Patrícia Abrantes, Constança Pomba, Adriana E. Rosato, Isabel Couto and Sofia Santos Costa

**Table S1.** Main characteristics of *S. coagulans* ( $n = 27$ ) isolates associated with canine skin infections included in the study [47].

Antimicrobial resistance profile and clonal lineages were determined previously.

| Isolate                  | Biological sample      | Resistance profile | PFGE type | Host | Year | Lab  |
|--------------------------|------------------------|--------------------|-----------|------|------|------|
| BIOS-V1 <sup>(1)</sup>   | skin swab              | MSSC, non-MDR      | F1        | Dog  | 2015 | Lab1 |
| BIOS-V2                  | skin swab              | MSSC, non-MDR      | A1        | Dog  | 2012 | Lab1 |
| BIOS-V3                  | skin swab              | MSSC, non-MDR      | F3        | Dog  | 2014 | Lab1 |
| BIOS-V9                  | skin swab              | MSSC, non-MDR      | C         | Dog  | 2018 | Lab1 |
| BIOS-V35                 | skin swab              | MSSC, non-MDR      | A8        | Dog  | 2018 | Lab1 |
| BIOS-V41                 | perianal skin swab     | MSSC, non-MDR      | A6        | Dog  | 2018 | Lab1 |
| BIOS-V42                 | skin swab              | MSSC, non-MDR      | H         | Dog  | 2001 | Lab1 |
| BIOS-V43                 | skin swab              | MSSC, non-MDR      | I         | Dog  | 2004 | Lab1 |
| BIOS-V44                 | skin swab              | MSSC, non-MDR      | G1        | Dog  | 2005 | Lab1 |
| BIOS-V45                 | perianal fistula swab  | MSSC, non-MDR      | A1        | Dog  | 2008 | Lab1 |
| BIOS-V46                 | skin swab              | MSSC, non-MDR      | B         | Dog  | 1999 | Lab1 |
| BIOS-V47                 | skin swab              | MSSC, non-MDR      | A3        | Dog  | 2003 | Lab1 |
| BIOS-V51                 | skin swab              | MSSC, non-MDR      | A3        | Dog  | 2007 | Lab1 |
| BIOS-V91                 | axillar skin swab      | MSSC, MDR          | A3        | Dog  | 2004 | Lab1 |
| BIOS-V93                 | skin swab              | MSSC, non-MDR      | G1        | Dog  | 2007 | Lab1 |
| BIOS-V94                 | skin swab              | MSSC, non-MDR      | A3        | Dog  | 2007 | Lab1 |
| BIOS-V95                 | skin swab              | MSSC, non-MDR      | A3        | Dog  | 2013 | Lab1 |
| BIOS-V98                 | skin swab              | MSSC, non-MDR      | A7        | Dog  | 2015 | Lab1 |
| BIOS-V107                | skin swab              | MSSC, non-MDR      | A2        | Dog  | 2015 | Lab1 |
| BIOS-V126 <sup>(1)</sup> | skin swab              | MSSC, non-MDR      | F2        | Dog  | 2016 | Lab1 |
| BIOS-V191                | skin swab              | MRSC, non-MDR      | D         | Dog  | 2018 | Lab2 |
| BIOS-V205                | skin swab              | MSSC, MDR          | A5        | Dog  | 2018 | Lab2 |
| BIOS-V209                | skin swab              | MSSC, non-MDR      | ---       | Dog  | 2018 | Lab2 |
| BIOS-V232                | epidermal collarette   | MSSC, non-MDR      | G2        | Dog  | 2018 | Lab2 |
| BIOS-V243                | skin swab              | MSSC, non-MDR      | A3        | Dog  | 2018 | Lab2 |
| BIOS-V265                | skin swab              | MSSC, non-MDR      | A4        | Dog  | 2018 | Lab2 |
| BIOS-V289                | interdigital skin swab | MSSC, non-MDR      | E         | Dog  | 2018 | Lab2 |

The numbers in brackets represent strains collected from the same animal. MSSC: methicillin-susceptible *Staphylococcus coagulans*; MRSC: methicillin-resistant *Staphylococcus coagulans*; MDR: multidrug resistant.

**Table S2. Main characteristics of *S. aureus* (*n* = 55) isolates associated with canine skin infections included in the study [45].**

Antimicrobial resistance profile and clonal lineages were determined previously.

| Isolate                  | Biological sample | Resistance profile | Clonal lineage | <i>agr</i> type | Host   | Year | Lab  |
|--------------------------|-------------------|--------------------|----------------|-----------------|--------|------|------|
| BIOS-V4                  | skin swab         | MRSA, MDR          | 398            | I               | Dog    | 2013 | Lab1 |
| BIOS-V5                  | skin swab         | MRSA, non-MDR      | 22             | I               | Dog    | 2014 | Lab1 |
| BIOS-V6                  | skin swab         | MRSA, non-MDR      | 22             | I               | Dog    | 2014 | Lab1 |
| BIOS-V19                 | skin swab         | MRSA, non-MDR      | 22             | I               | Cat    | 2012 | Lab1 |
| BIOS-V20                 | skin swab         | MRSA, non-MDR      | 22             | I               | Cat    | 2012 | Lab1 |
| BIOS-V21                 | skin swab         | MSSA, non-MDR      | 97             | I               | Cat    | 2014 | Lab1 |
| BIOS-V22                 | skin swab         | MRSA, non-MDR      | 22             | I               | Cat    | 2012 | Lab1 |
| BIOS-V30                 | skin swab         | MRSA, MDR          | 22             | I               | Dog    | 2014 | Lab1 |
| BIOS-V31                 | skin swab         | MSSA, non-MDR      | 188            | I               | Dog    | 2018 | Lab1 |
| BIOS-V60                 | skin swab         | MSSA, non-MDR      | 816            | II              | Horse  | 2001 | Lab1 |
| BIOS-V61                 | skin swab         | MSSA, non-MDR      | 5              | II              | Dog    | 2003 | Lab1 |
| BIOS-V62                 | skin swab         | MSSA, non-MDR      | 15             | II              | Cat    | 2005 | Lab1 |
| BIOS-V63                 | paw swab          | MRSA, non-MDR      | 22             | I               | Dog    | 2008 | Lab1 |
| BIOS-V70                 | skin swab         | MRSA, non-MDR      | 5              | II              | Dog    | 2015 | Lab1 |
| BIOS-V74 <sup>(2)</sup>  | pustule liquid    | MSSA, non-MDR      | 5              | II              | Dog    | 2003 | Lab1 |
| BIOS-V75                 | skin swab         | MSSA, non-MDR      | 72             | I               | Dog    | 2005 | Lab1 |
| BIOS-V76                 | skin swab         | MRSA, non-MDR      | 22             | I               | Cat    | 2012 | Lab1 |
| BIOS-V85 <sup>(2)</sup>  | pustule liquid    | MSSA, non-MDR      | 5              | II              | Dog    | 2003 | Lab1 |
| BIOS-V118                | skin swab         | MRSA, non-MDR      | 6535           | II              | Dog    | 2007 | Lab1 |
| BIOS-V128                | skin swab         | MSSA, non-MDR      | 5              | II              | Cat    | 2018 | Lab1 |
| BIOS-V129                | skin swab         | MSSA, non-MDR      | 121            | IV              | Rabbit | 2003 | Lab1 |
| BIOS-V147                | skin swab         | MSSA, non-MDR      | 398            | I               | Rabbit | 2017 | Lab2 |
| BIOS-V150                | skin swab         | MRSA, non-MDR      | 22             | I               | Dog    | 2017 | Lab2 |
| BIOS-V151                | skin swab         | MSSA, MDR          | 398            | I               | Cat    | 2017 | Lab2 |
| BIOS-V153                | skin swab         | MRSA, MDR          | 105            | II              | Dog    | 2018 | Lab2 |
| BIOS-V154                | skin swab         | MRSA, non-MDR      | 22             | I               | Cat    | 2018 | Lab2 |
| BIOS-V155 <sup>(3)</sup> | skin swab         | MRSA, non-MDR      | 22             | I               | Cat    | 2018 | Lab2 |
| BIOS-V156                | skin swab         | MSSA, non-MDR      | 6565           | I               | Dog    | 2018 | Lab2 |
| BIOS-V157                | skin swab         | MRSA-non-MDR       | 6566           | I               | Dog    | 2018 | Lab2 |
| BIOS-V158                | skin swab         | MSSA, non-MDR      | 7              | I               | Cat    | 2017 | Lab2 |
| BIOS-V159                | skin swab         | MRSA, non-MDR      | 22             | I               | Cat    | 2018 | Lab2 |
| BIOS-V160                | skin swab         | MRSA, non-MDR      | 5              | II              | Cat    | 2018 | Lab2 |
| BIOS-V161                | skin swab         | MRSA, non-MDR      | 22             | I               | Rabbit | 2018 | Lab2 |
| BIOS-V168                | skin swab         | MSSA, non-MDR      | 72             | I               | Cat    | 2018 | Lab2 |
| BIOS-V172                | skin swab         | MSSA, non-MDR      | 5              | II              | Dog    | 2018 | Lab2 |
| BIOS-V178                | skin swab         | MSSA, MDR          | 398            | I               | Cat    | 2018 | Lab2 |

The numbers in brackets represent strains collected from the same animal. MSSA: methicillin-susceptible *Staphylococcus aureus*; MRSA: methicillin-resistant *Staphylococcus aureus*; MDR: multidrug resistant.

Table S2. Continuation.

| Isolate                  | Biological sample | Resistance profile | Clonal lineage | agr type | Host   | Year | Lab  |
|--------------------------|-------------------|--------------------|----------------|----------|--------|------|------|
| BIOS-V183                | skin swab         | MRSA, non-MDR      | 22             | I        | Dog    | 2017 | Lab2 |
| BIOS-V184 <sup>(3)</sup> | skin swab         | MRSA, non-MDR      | 22             | I        | Cat    | 2018 | Lab2 |
| BIOS-V185                | skin swab         | MRSA, non-MDR      | 22             | I        | Dog    | 2018 | Lab2 |
| BIOS-V186                | skin swab         | MRSA, MDR          | 22             | I        | Dog    | 2018 | Lab2 |
| BIOS-V187                | skin swab         | MRSA, non-MDR      | 22             | I        | Dog    | 2018 | Lab2 |
| BIOS-V200 <sup>(4)</sup> | skin swab         | MRSA, non-MDR      | 22             | I        | Dog    | 2018 | Lab2 |
| BIOS-V201 <sup>(4)</sup> | skin swab         | MRSA, non-MDR      | 22             | I        | Dog    | 2018 | Lab2 |
| BIOS-V202                | skin swab         | MRSA, non-MDR      | 22             | I        | Cat    | 2018 | Lab2 |
| BIOS-V203                | skin swab         | MSSA, non-MDR      | 398            | I        | Dog    | 2018 | Lab2 |
| BIOS-V204 <sup>(5)</sup> | skin swab         | MRSA, non-MDR      | 22             | I        | Rabbit | 2017 | Lab2 |
| BIOS-V245                | skin swab         | MSSA, non-MDR      | 1              | III      | Dog    | 2018 | Lab2 |
| BIOS-V250                | skin swab         | MSSA, non-MDR      | 1              | III      | Dog    | 2018 | Lab2 |
| BIOS-V255                | skin swab         | MRSA, MDR          | 105            | II       | Dog    | 2018 | Lab2 |
| BIOS-V257                | skin swab         | MSSA, non-MDR      | 15             | II       | Cat    | 2017 | Lab2 |
| BIOS-V258 <sup>(5)</sup> | skin swab         | MRSA, non-MDR      | 22             | I        | Rabbit | 2017 | Lab2 |
| BIOS-V279                | skin swab         | MSSA, non-MDR      | 72             | I        | Cat    | 2018 | Lab2 |
| BIOS-V295                | skin swab         | MSSA, non-MDR      | 72             | I        | U      | 2018 | Lab2 |
| BIOS-V296                | skin swab         | MRSA, non-MDR      | 22             | I        | Dog    | 2018 | Lab2 |
| BIOS-V300                | skin swab         | MRSA, MDR          | 22             | I        | Dog    | 2018 | Lab2 |

The numbers in brackets represent strains collected from the same animal. MSSA: methicillin-susceptible *Staphylococcus aureus*; MRSA: methicillin-resistant *Staphylococcus aureus*; MDR: multidrug resistant; U= unknown source.

Table S3. Main characteristics of *S. pseudintermedius* ( $n = 155$ ) isolates associated with canine skin infections included in the study [46].

| Isolate                 | Biological sample | agr type | Host | Year | Lab  |
|-------------------------|-------------------|----------|------|------|------|
| BIOS-V7                 | skin swab         | IV       | Dog  | 2015 | Lab1 |
| BIOS-V10                | skin swab         | IV       | Dog  | 2018 | Lab1 |
| BIOS-V11 <sup>(7)</sup> | skin swab         | III      | Dog  | 2018 | Lab1 |
| BIOS-V12 <sup>(9)</sup> | skin swab         | III      | Dog  | 2018 | Lab1 |
| BIOS-V13                | paw swab          | I        | Dog  | 2018 | Lab1 |
| BIOS-V14                | skin swab         | III      | Dog  | 2018 | Lab1 |
| BIOS-V15                | skin swab         | III      | Dog  | 2018 | Lab1 |
| BIOS-V16                | interdigital swab | II       | Dog  | 2018 | Lab1 |
| BIOS-V18                | skin swab         | II       | Dog  | 2018 | Lab1 |
| BIOS-V25                | skin swab         | IV       | Dog  | 2016 | Lab1 |
| BIOS-V26                | biopsy            | IV       | Dog  | 2017 | Lab1 |
| BIOS-V27                | skin swab         | IV       | Dog  | 2018 | Lab1 |

The numbers in brackets represent strains collected from the same animal. MSSP: methicillin-susceptible *Staphylococcus pseudintermedius*; MRSP: methicillin-resistant *Staphylococcus pseudintermedius*; MDR: multidrug resistant.

Table S3. Continuation.

| Isolate                  | Biological sample           | <i>agr</i> type | Host | Year | Lab  |
|--------------------------|-----------------------------|-----------------|------|------|------|
| BIOS-V28                 | skin swab                   | III             | Dog  | 2018 | Lab1 |
| BIOS-V29                 | interdigital swab           | I               | Dog  | 2018 | Lab1 |
| BIOS-V32                 | skin swab                   | I               | Dog  | 2018 | Lab1 |
| BIOS-V34 <sup>(7)</sup>  | skin swab                   | III             | Dog  | 2018 | Lab1 |
| BIOS-V36                 | skin biopsy                 | III             | Dog  | 2017 | Lab1 |
| BIOS-V37 <sup>(10)</sup> | skin swab                   | IV              | Dog  | 2018 | Lab1 |
| BIOS-V38                 | skin swab                   | III             | Dog  | 2018 | Lab1 |
| BIOS-V39                 | skin biopsy                 | III             | Dog  | 2016 | Lab1 |
| BIOS-V40                 | skin swab                   | III             | Dog  | 2016 | Lab1 |
| BIOS-V48                 | secretion                   | III             | Dog  | 2014 | Lab1 |
| BIOS-V49                 | skin swab                   | II              | Dog  | 2015 | Lab1 |
| BIOS-V50 <sup>(11)</sup> | pustule                     | II              | Dog  | 2015 | Lab1 |
| BIOS-V52 <sup>(10)</sup> | skin biopsy                 | III             | Dog  | 2017 | Lab1 |
| BIOS-V53 <sup>(6)</sup>  | skin swab                   | III             | Dog  | 2015 | Lab1 |
| BIOS-V54                 | skin swab                   | III             | Dog  | 2018 | Lab1 |
| BIOS-V55                 | skin swab                   | IV              | Dog  | 2014 | Lab1 |
| BIOS-V56                 | skin swab                   | I               | Dog  | 2014 | Lab1 |
| BIOS-V57                 | skin swab                   | IV              | Dog  | 2015 | Lab1 |
| BIOS-V58 <sup>(12)</sup> | skin swab                   | III             | Dog  | 2014 | Lab1 |
| BIOS-V59                 | skin swab                   | I               | Dog  | 2017 | Lab1 |
| BIOS-V64                 | interdigital swab           | III             | Dog  | 2018 | Lab1 |
| BIOS-V65                 | skin swab                   | IV              | Dog  | 2018 | Lab1 |
| BIOS-V66                 | lip crease swab             | III             | Dog  | 2015 | Lab1 |
| BIOS-V67                 | skin swab                   | IV              | Dog  | 2018 | Lab1 |
| BIOS-V68                 | armpit skin swab            | IV              | Dog  | 2015 | Lab1 |
| BIOS-V71                 | pustule swab                | IV              | Dog  | 2015 | Lab1 |
| BIOS-V72                 | skin swab                   | I               | Dog  | 2018 | Lab1 |
| BIOS-V73                 | skin swab                   | IV              | Dog  | 2017 | Lab1 |
| BIOS-V77                 | swab                        | IV              | Dog  | 2015 | Lab1 |
| BIOS-V78                 | scrotal swab                | III             | Dog  | 2015 | Lab1 |
| BIOS-V79                 | skin swab                   | I               | Dog  | 2015 | Lab1 |
| BIOS-V82 <sup>(11)</sup> | epidermal scab swab         | III             | Dog  | 2015 | Lab1 |
| BIOS-V83                 | abdominal area pustule swab | III             | Dog  | 2015 | Lab1 |
| BIOS-V84                 | pustule swab                | IV              | Dog  | 2015 | Lab1 |
| BIOS-V87                 | swab                        | III             | Dog  | 2014 | Lab1 |
| BIOS-V88 <sup>(12)</sup> | scab swab                   | IV              | Dog  | 2015 | Lab1 |
| BIOS-V89 <sup>(13)</sup> | skin granuloma              | IV              | Dog  | 2015 | Lab1 |
| BIOS-V90                 | skin swab                   | III             | Dog  | 2015 | Lab1 |

The numbers in brackets represent strains collected from the same animal. MSSP: methicillin-susceptible *Staphylococcus pseudintermedius*; MRSP: methicillin-resistant *Staphylococcus pseudintermedius*; MDR: multidrug resistant.

Table S3. Continuation.

| Isolate                  | Biological sample               | <i>agr</i> type | Host   | Year | Lab  |
|--------------------------|---------------------------------|-----------------|--------|------|------|
| BIOS-V92                 | skin swab                       | II              | Dog    | 2005 | Lab1 |
| BIOS-V96 <sup>(8)</sup>  | swab                            | IV              | Dog    | 2015 | Lab1 |
| BIOS-V97                 | suture swab                     | III             | Dog    | 2015 | Lab1 |
| BIOS-V99 <sup>(13)</sup> | chronic wound swab              | III             | Dog    | 2015 | Lab1 |
| BIOS-V101                | skin swab                       | II              | Dog    | 2017 | Lab1 |
| BIOS-V102                | skin swab                       | I               | Dog    | 2015 | Lab1 |
| BIOS-V103                | interdigital swab               | II              | Dog    | 2015 | Lab1 |
| BIOS-V104                | fistula swab                    | III             | Dog    | 2014 | Lab1 |
| BIOS-V105 <sup>(6)</sup> | skin swab                       | II              | Dog    | 2017 | Lab1 |
| BIOS-V106                | deep biopsy                     | III             | Dog    | 2017 | Lab1 |
| BIOS-V108                | skin granuloma                  | III             | Dog    | 2015 | Lab1 |
| BIOS-V110                | skin swab                       | I               | Dog    | 2015 | Lab1 |
| BIOS-V113                | abdominal area pustule          | III             | Dog    | 2018 | Lab1 |
| BIOS-V114                | dermatitis fistula in hind limb | I               | Dog    | 2015 | Lab1 |
| BIOS-V116 <sup>(8)</sup> | skin pustules                   | IV              | Dog    | 2015 | Lab1 |
| BIOS-V117                | skin swab                       | II              | Dog    | 2018 | Lab1 |
| BIOS-V119                | skin swab                       | III             | Dog    | 2018 | Lab1 |
| BIOS-V120                | skin swab                       | III             | Dog    | 2017 | Lab1 |
| BIOS-V121                | skin swab                       | II              | Dog    | 2018 | Lab1 |
| BIOS-V122                | paw swab                        | IV              | Dog    | 2018 | Lab1 |
| BIOS-V123                | skin exudate                    | IV              | Dog    | 2015 | Lab1 |
| BIOS-V124                | perilabial swab                 | III             | Dog    | 2015 | Lab1 |
| BIOS-V125                | skin biopsy                     | III             | Dog    | 2015 | Lab1 |
| BIOS-V127 <sup>(8)</sup> | skin swab                       | IV              | Dog    | 2016 | Lab1 |
| BIOS-V130                | Paracostal abscess              | I               | Rabbit | 2003 | Lab1 |
| BIOS-V131                | finger swab                     | III             | Dog    | 2014 | Lab1 |
| BIOS-V132                | chronic wound swab              | I               | Dog    | 2015 | Lab1 |
| BIOS-V133                | skin swab                       | III             | Dog    | 2014 | Lab1 |
| BIOS-V134                | interdigital swab               | II              | Dog    | 2014 | Lab1 |
| BIOS-V135                | pustule swab                    | IV              | Dog    | 2015 | Lab1 |
| BIOS-V136                | perilabial swab                 | III             | Dog    | 2015 | Lab1 |
| BIOS-V137                | skin swab                       | II              | Dog    | 2014 | Lab1 |
| BIOS-V138                | paw swab                        | II              | Dog    | 2018 | Lab1 |
| BIOS-V140                | skin swab                       | III             | Dog    | 2015 | Lab1 |
| BIOS-V141                | skin swab                       | II              | Dog    | 2015 | Lab1 |
| BIOS-V142                | skin swab after disinfection    | III             | Dog    | 2014 | Lab1 |
| BIOS-V143 <sup>(9)</sup> | Hind limb lesion swab           | III             | Dog    | 2014 | Lab1 |

The numbers in brackets represent strains collected from the same animal. MSSP: methicillin-susceptible *Staphylococcus pseudintermedius*; MRSP: methicillin-resistant *Staphylococcus pseudintermedius*; MDR: multidrug resistant.

Table S3. Continuation.

| Isolate                  | Biological sample              | agr type | Host | Year | Lab  |
|--------------------------|--------------------------------|----------|------|------|------|
| BIOS-V144 <sup>(9)</sup> | pustule swab                   | III      | Dog  | 2014 | Lab1 |
| BIOS-V145                | ventral pustule                | IV       | Dog  | 2018 | Lab1 |
| BIOS-V146                | skin swab                      | III      | Dog  | 2015 | Lab1 |
| BIOS-V162                | nodular lesion swab            | IV       | Dog  | 2018 | Lab2 |
| BIOS-V164                | surgical wound swab            | IV       | Dog  | 2018 | Lab2 |
| BIOS-V167                | submandibular abscess swab     | II       | Dog  | 2018 | Lab2 |
| BIOS-V170                | arm abscess swab               | IV       | Dog  | 2018 | Lab2 |
| BIOS-V175                | skin swab                      | IV       | Dog  | 2018 | Lab2 |
| BIOS-V176                | skin swab                      | II       | Dog  | 2018 | Lab2 |
| BIOS-V179                | skin swab                      | III      | Dog  | 2018 | Lab2 |
| BIOS-V182                | subcutaneous swab              | IV       | Dog  | 2018 | Lab2 |
| BIOS-V188                | hind limb abscess swab         | III      | Dog  | 2018 | Lab2 |
| BIOS-V189                | pyoderma swab                  | IV       | Dog  | 2018 | Lab2 |
| BIOS-V190                | papule in armpit               | I        | Dog  | 2018 | Lab2 |
| BIOS-V194                | skin swab                      | III      | Dog  | 2018 | Lab2 |
| BIOS-V195                | skin swab                      | III      | Dog  | 2018 | Lab2 |
| BIOS-V196                | skin swab                      | III      | Dog  | 2018 | Lab2 |
| BIOS-V207                | thigh wound swab               | III      | Cat  | 2018 | Lab2 |
| BIOS-V211                | skin swab                      | IV       | Dog  | 2018 | Lab2 |
| BIOS-V212                | interdigital swab              | IV       | Dog  | 2018 | Lab2 |
| BIOS-V213                | amputation thigh material swab | III      | Dog  | 2018 | Lab2 |
| BIOS-V214                | skin swab                      | II       | Dog  | 2018 | Lab2 |
| BIOS-V217                | skin swab                      | IV       | Dog  | 2018 | Lab2 |
| BIOS-V218                | skin swab                      | III      | Dog  | 2018 | Lab2 |
| BIOS-V219                | skin swab                      | IV       | Dog  | 2018 | Lab2 |
| BIOS-V221                | skin swab                      | I        | Dog  | 2018 | Lab2 |
| BIOS-V223                | surgical site swab             | III      | Dog  | 2018 | Lab2 |
| BIOS-V224                | face mass swab                 | II       | Dog  | 2018 | Lab2 |
| BIOS-V225                | interdigital swab              | III      | Dog  | 2018 | Lab2 |
| BIOS-V226                | pelvic limb swab               | II       | Dog  | 2018 | Lab2 |
| BIOS-V227                | pustule swab                   | III      | Dog  | 2018 | Lab2 |
| BIOS-V228                | skin swab                      | II       | Dog  | 2018 | Lab2 |
| BIOS-V230                | pelvic limb biopsy             | IV       | Dog  | 2018 | Lab2 |
| BIOS-V231                | skin swab                      | IV       | Dog  | 2018 | Lab2 |
| BIOS-V233                | papule swab                    | IV       | Dog  | 2018 | Lab2 |
| BIOS-V234                | skin swab                      | III      | Dog  | 2018 | Lab2 |
| BIOS-V235                | skin pustule swab              | III      | Dog  | 2018 | Lab2 |
| BIOS-V236                | skin swab                      | III      | Dog  | 2018 | Lab2 |

The numbers in brackets represent strains collected from the same animal. MSSP: methicillin-susceptible *Staphylococcus pseudintermedius*; MRSP: methicillin-resistant *Staphylococcus pseudintermedius*; MDR: multidrug resistant.

Table S3. Continuation.

| Isolate   | Biological sample              | agr type | Host | Year | Lab  |
|-----------|--------------------------------|----------|------|------|------|
| BIOS-V237 | torso swab                     | III      | Dog  | 2018 | Lab2 |
| BIOS-V238 | skin swab                      | IV       | Dog  | 2018 | Lab2 |
| BIOS-V239 | limb swab                      | IV       | Dog  | 2018 | Lab2 |
| BIOS-V240 | fracture wound swab            | III      | Cat  | 2018 | Lab2 |
| BIOS-V241 | granuloma swab                 | III      | Dog  | 2018 | Lab2 |
| BIOS-V242 | biopsy swab                    | II       | Dog  | 2018 | Lab2 |
| BIOS-V244 | skin swab                      | III      | Dog  | 2018 | Lab2 |
| BIOS-V247 | callus swab                    | II       | Dog  | 2018 | Lab2 |
| BIOS-V249 | skin swab                      | III      | Dog  | 2018 | Lab2 |
| BIOS-V251 | exudate swab                   | II       | Dog  | 2018 | Lab2 |
| BIOS-V259 | skin swab                      | IV       | Dog  | 2018 | Lab2 |
| BIOS-V260 | foreskin swab                  | IV       | Dog  | 2018 | Lab2 |
| BIOS-V262 | dermal punch                   | II       | Dog  | 2018 | Lab2 |
| BIOS-V263 | papule                         | IV       | Dog  | 2018 | Lab2 |
| BIOS-V264 | interdigital swab              | III      | Dog  | 2018 | Lab2 |
| BIOS-V268 | skin exudate swab              | II       | Dog  | 2018 | Lab2 |
| BIOS-V270 | skin wound swab                | III      | Dog  | 2018 | Lab2 |
| BIOS-V273 | wound swab                     | II       | Dog  | 2018 | Lab2 |
| BIOS-V276 | thigh swab                     | III      | Dog  | 2018 | Lab2 |
| BIOS-V280 | surgical material              | III      | Dog  | 2018 | Lab2 |
| BIOS-V281 | skin swab                      | III      | Dog  | 2018 | Lab2 |
| BIOS-V285 | skin swab                      | III      | Dog  | 2018 | Lab2 |
| BIOS-V286 | pustule swab                   | III      | Dog  | 2018 | Lab2 |
| BIOS-V287 | skin swab                      | III      | Dog  | 2018 | Lab2 |
| BIOS-V290 | chin swab                      | III      | Dog  | 2018 | Lab2 |
| BIOS-V292 | suture swab                    | II       | Cat  | 2018 | Lab2 |
| BIOS-V297 | skin swab                      | III      | Dog  | 2018 | Lab2 |
| BIOS-V298 | skin swab                      | I        | Dog  | 2018 | Lab2 |
| BIOS-V299 | interdigital furunculosis swab | III      | Dog  | 2018 | Lab2 |
| BIOS-V302 | skin swab                      | III      | Dog  | 2018 | Lab2 |

The numbers in brackets represent strains collected from the same animal. MSSP: methicillin-susceptible *Staphylococcus pseudintermedius*; MRSP: methicillin-resistant *Staphylococcus pseudintermedius*; MDR: multidrug resistant.

Table S4. Primers used in this study.

| Gene                                   | Primers       | Sequence (5′-3′)                 | Amplicon size (pb) | Reference |
|----------------------------------------|---------------|----------------------------------|--------------------|-----------|
| <i>Staphylococcus pseudintermedius</i> |               |                                  |                    |           |
| lukF                                   | lukF_SP_Fw    | CCTGTCTATGCCGCTAATCAA            | 572                | [90]      |
|                                        | lukF_SP_Rv    | AGGTCATGGAAGCTATCTCGA            |                    |           |
| icaADB                                 | icaADB_SP_Fw  | GCAACATGGTCAAGTCCAGA             | 358                | This work |
|                                        | icaADB_SP_Rv  | CGACACACCCTATGGCTATG             |                    |           |
| agrD                                   | agrD_SP_Fw    | GGGGTATTATTACAATCATTC            | 300                | [88]      |
|                                        | agrD_SP_Rv    | CTGATGCGAAAATAAAGGATTG           |                    |           |
| <i>Staphylococcus aureus</i>           |               |                                  |                    |           |
| lukS-<br>PV/lukF-<br>PV                | lukSF_Fw      | CATTAGGTAAAATGTCTGG              | 431                | This work |
|                                        | lukSF_Rv      | GCATCAACTGTATTGGAT               |                    |           |
| icaADB                                 | icaADB_SA_Fw  | AGTTCTTGTCGCATTTCCAA             | 359                | This work |
|                                        | icaADB_SA_Rv  | CACGATTCTCTTCCTCTCTGC            |                    |           |
| agr                                    | pan_agr_SA_Fw | ATGCACATGGTGCACATGC              | 439                | [89]      |
|                                        | agr_I_SA_Rv   | GTCACAAGTACTATAAGCTGCGAT         |                    |           |
|                                        | agr_II_SA_Rv  | TATTACTAATTGAAAAGTGCCATAGC       | 572                |           |
|                                        | agr_III_SA_Rv | GTAATGTAATAGCTTGTATAATAATAC CCAG | 321                |           |
|                                        | agr_IV_SA_Rv  | CGATAATGCCGTAATACCCG             | 657                |           |

## References

- Costa, S. S.; Ribeiro, R.; Serrano, M.; Oliveira, K.; Ferreira, C.; Leal, M.; Pomba, C.; Couto, I. *Staphylococcus aureus* causing skin and soft tissues infections in companion animals: antimicrobial resistance profiles and clonal lineages. *Antibiotics* **2022**, *11*, 599. <https://doi.org/10.3390/antibiotics11050599>
- Morais, C.; Costa, S.S.; Andrade, M.; Ramos, B.; Leal, M.; Abrantes, P.; Pomba, C.; Couto, I. Clonal lineages of *Staphylococcus pseudintermedius* associated with skin and soft tissues infections in pets, Portugal. In Proceedings of the 31<sup>st</sup> European Congress of Clinical Microbiology and Infectious Diseases, Vienna, Austria, 9–12 July 2021.
- Costa, S.S.; Oliveira, V.; Serrano, M.; Pomba, C.; Couto, I. Phenotypic and molecular traits of *Staphylococcus coagulans* associated with canine skin infections in Portugal. *Antibiotics* **2021**, *10*, 518. <https://doi.org/10.3390/antibiotics10050518>
- Couto, N.; Belas, A.; Oliveira, M.; Almeida, P.; Clemente, C.; Pomba, C. Comparative RNA-seq-Based transcriptome analysis of the virulence characteristics of methicillin-resistant and -susceptible *Staphylococcus pseudintermedius* strains isolated from small animals. *Antimicrob Agents Chemother* **2015**, *60*, 962-7. <https://doi.org/10.1128/AAC.01907-15>
- Lina, G.; Boutite, F.; Tristan, A.; Bes, M.; Etienne, J.; Vandenesch, F. Bacterial competition for human nasal cavity colonization: role of *Staphylococcus aureus* agr alleles. *Appl Environ Microbiol* **2003**, *69*, 18-23. <https://doi.org/10.1128/AEM.69.1.18-23.2003>
- Futagawa-Saito, K.; Sugiyama, T.; Karube, S.; Sakurai, N.; Ba-Thein, W.; Fukuyasu, T. Prevalence and characterization of leukotoxin-producing *Staphylococcus intermedius* in isolates from dogs and pigeons. *J Clin Microbiol* **2004**, *42*(11), 5324-6.
